# Supplementary material for: Systems Level Analyses Reveal Multiple Regulatory Activities of CodY Controlling Metabolism, Motility and Virulence in Listeria monocytogenes
Source: PubMed Central journal article supplement (PMC4760761; doi:10.1371/journal.pgen.1005870), 2016-02-19
Supplement: pgen.1005870.s003.pdf [file pgen.1005870.s003.pdf]

A

*hisZ* (LMRG\_00251)

ATTC AACCTCTTTCAA AATCTTTTTCCCAAGTGC TTTAAATGGTACACTAATTATACCATAAGCAACT **ATTTTCTATTCA**TTA **TTTACA**AAAACGCT < 100  
 >CodY Box 5 mm >-35  
 TTAACG **TGCTAATAT**GTCTAATAAACTAAAATATCGTAAAGGAGCTAACCAG **ATGA**ACTTAAATAAGAACTTACCAACTGGAACACGTGATAAACTTTTTTC < 200  
 >-10  
 >LMRG\_00251  
 GTGAAGCAGAGCTGCATACAAAATTGAGCAACAAGTGAATCATTATTTT < 250

B

*rbsV* (LMRG\_02317) first gene in *sigB* operon

GAAGAAGTGAAGACGTACCTCATTCTTTAGAGAGCATTACTGGTGAGTAAACGTATTTAAAGAGTGGAGCGTTTTTATTT **TTGAAT**GTTTTAATTTTAT < 100  
 >-35  
 TAGTTA **GGGTAAAAT**CGAC **AGTATACTTAAAATT**AGATGGGGTGAAGTGA **TGAATATTAGTATAGAAAATAAAAGA**ACGTGATACTGACCACATAGACATA < 200  
 >-10 >CodY Box 4 mm  
 >LMRG\_02317 [\*]  
 TTTGTTGCTGGGGAGATCGATGCTTATACAGCGCCAAAGGTAAAAGAAGCATTAGAAGTATATCAAGTTAAAGAGGG < 277

C

*glpF* (LMRG\_01431)

AACCGTCACTTGTGGCGGTTTTTTTGTGTTTTTCATCT **TTGTGA**ATTAATTTTG **ATTTCTTTTAAAATT**GGTTATAACTCTCGGAATTGGGGTAAAAGTA < 100  
 >-35 >-10 >CodY Box 4 mm  
 AAGAGGCAGATGAAGATACATTTGTGAAAATTGATATGATAGGACAAGTCGTTTGATTGACAGCGTTTCTTGATATGATTAATAGACTCAAGTTAATT < 200  
 AACATGTCAGGAGAAGAGATGACAATCGAAACGATGCAAGGGTACTAGTGTGCCTACGTTTTGATTGTCATCTTTTTTTGAAGTTAATTGATAATCGGA < 300  
 ATGTAAGGGGACTAGTAAGTGTAAAATTCGGTGCTACAAAATAAGCAAGAAGAAGGAGTTGGAAAAG **ATGATTGACACAAGTTTAGCAACACAATTTCT** < 400  
 >LMRG\_01431  
 AAGTGAAGTCATTGGTACGGCTATACTAATTATTTTAGGTGCTGGTGTCTGTCGTCAGGTTTCTACTGAAAAGATCCAAGCAGAGAATG < 489

D

*argG* (LMRG\_01241)

ATTCGCTCAACTCCTTCAATATAACTTCAATAACAAGTATAGCAGTTTTATGAACAGGAACCAATTTATTACTATTTGAAATGATTATTTTTATTAGAA < 100

ATGTATTTTTAAGCAT**AATTATGAATAAAT**GAAAATAAAAAGG**TTGATA**TCTAAAAGCATCGA**TGTTAATAT**AAATACAAATGTTTGTATATTTATGAAT < 200

AGGGGATGTTTAAA**ATGGCGAAAGAAAAAATCGTATTAGCTTACTCAGGTGGGTTAGATACTTCTGTGGCAATTCAGTGGTTAGTAGAATCAGGTTATGA** < 300

**AGTTATTGCATGTT** < 314

E

*gadC* (LMRG\_01480)

CATTAATCCTCCCTCTTCCATTATTACCTTTCAATATCC**TTAATGG**ACATTTAACATCT**ATATACAAT**ACACCCATTTTTTTTAAAGTGCAAGAGTTT < 100

TTTACTAAAAATGGAAAAAATTTAATGAATGCGTTTGCCTGCGAATAGAACAACTATAAGCATTGTCTCAAAAATTTTTCTGGCTAAGAAAAAACTGG < 200

AAT**AATTTTCGAAAACA**AACGTGCTAATCTTATACATGTTCCAACAACAATTACTTAGAGGTGCTTTTCTCGTGTTAACTGATGATGTTCCAAAAAA < 300

TCACATTTACCATTAATTAAGCATCATTCTAATTACTTTATAGCTTCGTTTAGTTGATTTTCGCAAAACAAAAATGGGAGGTAACATACA**ATGTCTAAA** < 400

**CAAGCAAAGTCTTTAACCTTATTCCGATTTTTTCGCCATCACGGCTTCCATGGTTATGACCGTTTATGAATATCCAACATTTGCCACTTCCG** < 491

F

*feoA* (LMRG\_01257)

GTTAATTCCTCCATTAATATACATATTTATAGTTACCATTTTACTATAAAAAAGAACAACCTTGACAGAAAAAAGTGATTAAAAACAGCTCCAGCCTTA < 100

TTTCCGTGTATCAATACAGAGGTAAAAAGGCATGCCACTTAGGCAAAAGACGGCTATGCTCTTAAGAAATTTTTTGTCTGTTATACCTACTATTTTGCT < 200

ATCTAACAGC**AATTTCAAAAAAAC**ATTC**AT**TTAAGGCTGTTCG**TGATAAAAT**GAAACATAGTTGATAATGATTATCATGTTTACATAACATAAA < 300

AGGAGGCCTGCTAGCTT**ATGCAATTAATGAAACTG**CTGTGGTGAAAAAGTTTCGCATCTCAGAATTAATAAATGAGAACGCTATGCTTAAACGTCGCTT < 400

**ACTTGCACCTGGTTGCGATGAAGGTTGTGATATTTGTATCAAACAAAAAGGACTATTTGGTG** < 462

G

*actA* (LMRG\_02626)

TTAACAAATGTTAGAGAAAAATTAATTCTCCAAGT**GATATTC**<sup>>-35</sup>**TTAAAATA**<sup>>CodY Box 4 mm</sup>ATTCATGAATATTTTT**CTTATATT**<sup>>-10</sup>AGCTAATTAAGAAGATAATTAACTG < 100  
 CTAATCCAATTTTTAACGGAAT**AAATTAGTGAAAATG**AAGGCCGAATTTTCCTTGTTCAAAAAGGTTGTATTAGCGTATCACGAGGAGGGAGTATAAGT < 200  
 GGGATTAAATAGATTTATGCGTGCATGATGGTAGTTTTCTATTACTGCCAACTGCATTACGATTAACCCCGACATAATATTTGCAGCGACAGATA < 295  
 >LMRG\_02626

H

*gdhA* (LMRG\_00242)

CTTCTATATCTACTCATTAAAACCTAAGCAAACGTTCTCATTAACTACATTTTTAAA**AAATTTTCAGAAAAATT**GGTTTTTATGC**TTGAAA**<sup>>-35</sup>ATATTCTCAAC < 100  
 AAT**GTGTA**<sup>>-10</sup>**AACT**TAACAACATAGGTAAGAAAAGTTGACCAAATTTTCAGAAAAATTTACTTAACGCACACAAGCCAATGTTTTCTTCTTTATAACATTGCA < 200  
 TGTATTTGCGTCAGTTTTCTACTTTTCTTATAGTCAAAATATTTAAACAAGGAGCGATTATAGT**ATGGCACAAACATCCACTATCCAAAACGACACAA** < 300  
 AGGCAGCCGAAGAATACGCAGCTCGAGTGTGGAAACAATTAACAACGGAATCCTGGCGAAACGGAATTCACCAAGCAGTTGAAGAATTC**TAAACTC** < 400  
 TGTATCCAGCCCTTGCAAAAAGAACCTAAATACGAAGCAAATGGCATTTTAGAACAGTTAACGAAACCGAACGCCTTATCAGTTTCCGAGTTCCATGG < 500  
 GTGGATGATTCTGGCA < 516  
 >LMRG\_00242

I

*poxB* (LMRG\_00411)

TATAATTCTCCTTTAATAGTTTAAATGTTGGTTAAACTAGCTGAAGGATTGAAGAGTTTATTTCACTCTTACT**TTTCTA**<sup>>-35</sup>ACAATCCTAAAGCCAT**TGTTAG**<sup>>-10</sup> < 100  
**AAAG**TCGAGAGCAGTGCAATTTGTTTGCATCTCTTTGATCACACCTTGCCTTCATTATAAGCACTTCTG**AAATGTTTCGTC**<sup>>CodY box 4 mm</sup>**CAATT**CTCTTTTATGAATA < 200  
 CTCTTCTAAAAACAGGGTAAACGAAAACCTATTGGACATTAGAGAAAAATCCATGGGAGGAGAAAGTAAA**ATGAAAAAAGTAAAAGCAAGTGAAACACTC** < 300  
 GTACAAACATTAAAAAATGGGGTATCGACCACGTATATGGCTTGCCCGCGATTTCGATTGACACCGTAGTTGACGCTTTACGAAAAGAAC < 391  
 >LMRG\_00411

J

*glnR* (LMRG\_00748)

>Cody Box 4 mm  
 AAAAGTAACATTT**ATTTTTCAGAAAAA**ATTTTAAATTTTACCGCGATGGATTTCATTCGCGGTTTTTTTGTATGTAATGCATTGGTATATAAGGCTTTA < 100

>-35 >-10  
 TCTATAATGTTAGATTATCTAACATAAAT**TGACA**AAACATCTAACGTAC**ATTATAA**TGCTACTATCATCAAAAAATAATTATGTTTTGAGGGGAATT < 200

>LMRG\_00748  
 GTC**G**TGAGCGAAAAGGAAATCCGGAGATCGATGCCGCTTTTTCCAATTGGGCCTGTGATGAAGCTAACTGATCTCACTGCTAGACAAATTCGCTACTATG < 300

< 300

K

*fliN* (LMRG\_02874)

>Cody Box 4 mm  
 ACAATCACATATCTCTATCCTATAGTATTATT**GATTTTCTGTTTATT**TTTATAATAACAATATATGTTAGTTGTGTAAGGGAACGCGAGTAGGTCAA < 100

AAGGATTGGGTATGAAGAACCTTTTTTGAGTTAAATAGAAAAATATAAATCGAATAATGAGAAGTTTTCCTTTGATACAGCTGTTACACTGGCTGTTTT < 200

>-35 >-10  
 TTTATT**TTTACA**CACAATTCAT**TTTTTAAAA**AAAGTATAGATTTTTTCTGGATTGGTGTAAAATTTTATATTGCAGTTACAAAAACACTTTATTGAT < 300

>Cody Box 4 mm  
 ATAT**ATTTTGAAAAATG**ATTTATTTTGTAACTGATGAAGGGAGTGAAAGGTGAATTTACCTTACTTGA**ATGGAATATTTTTGTCAC**TTTTAAAAAT < 400

>LMRG\_02874  
 TATTGTACTTTTTGGCAGTACTTGCGGGAATTTCTTATTTTTTAGTTAAGAAAAACAAGCAAGCGAATCGCACGAGAAAAGCGAAAATGATCTAATAAAG < 500
